1 **Bioelectric-calcineurin signaling module regulates allometric growth and size**  
2 **of the zebrafish fin**

3  
4

5 Running Title:

6 Bioelectricity and fin growth

7  
8

9 Jacob M Daane<sup>1</sup>, Jennifer Lanni<sup>1,2</sup>, Ina Rothenberg<sup>3</sup>, Guiscard Seebohm<sup>3</sup>, Charles W Higdon<sup>4</sup>,  
10 Stephen L Johnson<sup>4</sup>, Matthew P Harris<sup>1</sup>

11  
12

13

14 <sup>1</sup>Department of Genetics, Harvard Medical School; Department of Orthopedic Research, Boston

15 Children's Hospital, 300 Longwood Avenue, Boston MA 02115;

16 <sup>2</sup>Department of Biology, Wheaton College, Norton MA 02766;

17 <sup>3</sup>Institute for Genetics of Heart Diseases (IfGH), Department of Cardiovascular Medicine,

18 University Hospital Muenster, Muenster, Germany;

19 <sup>4</sup>Department of Genetics, Washington University Medical School, Saint Louis MO 63110

20  
21

22 Corresponding Author

23 Email: [harris@genetics.med.harvard.edu](mailto:harris@genetics.med.harvard.edu)

24  
25

26 Keywords: allometry, zebrafish, *kcnk5b*, calcineurin, bioelectric signaling, regeneration

27  
28

## 29 **Abstract**

30 The establishment of relative size of organs and structures is paramount for attaining final form  
31 and function of an organism. Importantly, variation in the proportions of structures frequently  
32 underlies adaptive change in morphology in evolution and maybe a common mechanism  
33 underlying selection. However, the mechanism by which growth is integrated within tissues  
34 during development to achieve proper proportionality is poorly understood. We have shown that  
35 signaling by potassium channels mediates coordinated size regulation in zebrafish fins.  
36 Recently, calcineurin inhibitors were shown to elicit changes in zebrafish fin allometry as well.  
37 Here, we identify the potassium channel *kcnk5b* as a key player in integrating calcineurin's  
38 growth effects, in part through regulation of the cytoplasmic C-terminus of the channel. We  
39 propose that the interaction between Kcnk5b and calcineurin acts as a signaling node to regulate  
40 allometric growth. Importantly, we find that this regulation is epistatic to inherent mechanisms  
41 instructing overall size as inhibition of calcineurin is able to bypass genetic instruction of size as  
42 seen in *sof* and wild-type fins, however, it is not sufficient to re-specify positional memory of  
43 size of the fin. These findings integrate classic signaling mediators such as calcineurin with ion  
44 channel function in the regulation of size and proportion during growth.

## 45 **Introduction**

46 The establishment of relative proportion of structures and organs is essential for the normal  
47 physiology and function of an organism. The study of differential growth of structures in  
48 development and in the evolution of form has a rich history (Gayon, 2000). A key advance in  
49 our understanding differential growth stems from the work of D'Arcy Thompson and his efforts  
50 to define the underlying rules of coordinated transformations in form (Thompson, 1917). This  
51 foundational work was leveraged by Huxley and Teissier who formalized scaling relationships  
52 between structures within organisms as a power law that details the relative proportion of  
53 structures (Huxley and Teissier, 1936; Julian Huxley, 1932)). This law provides a scale-  
54 independent means of comparing growth in development and among species.

55 A common mechanism for the establishment of organ size and the relative proportions of  
56 structures is through differential sensitivity of organs to a systemic growth signal such as insulin-  
57 like growth factors (IGF) or growth hormone (GH) (Bryant and Simpson, 1984; Conlon and  
58 Raff, 1999). However, there is substantial evidence for an organ-intrinsic capacity to establish

59 relative size that is robust to such broad systemic signals. Transplanted organs will frequently  
60 reach their target size even when cultured in ectopic locations (Dittmer et al., 1974; Felts, 1959;  
61 Twitty et al., 1931). Intrinsic regulation of size in structures is also observed in cases in which  
62 organs will accelerate growth back to a seemingly pre-ordained growth trajectory following  
63 growth-limiting insults, such as nutrient deprivation or illness (Finkielstain et al., 2013; Prader et  
64 al., 1963). This “catch-up growth” is also seen during epimorphic regeneration, wherein growth  
65 rate is dependent on the amount of tissue lost such that recovery of the original form occurs  
66 within the same time window; this suggests that relative growth rates are guided by *retained*  
67 positional cues within tissues (Lee et al., 2005; Morgan, 1906; Spallanzani, 1769; Tassava and  
68 Goss, 1966). How growth is integrated with positional information within the organ to achieve  
69 proper proportion remains unclear.

70 An effective strategy to understand growth and regulation of size is to analyze mutants or  
71 experimental conditions in which scaling properties have been altered. Through genetic screens  
72 in the zebrafish, several mutants have been identified that have adult fins that are reduced in size  
73 as well as mutants in which fins grow beyond their normal limit (Eeden et al., 1996; Fisher et al.,  
74 2003; Goldsmith et al., 2003; Green et al., 2009; Huang et al., 2009; Iovine and Johnson, 2000;  
75 Iovine et al., 2005; Perathoner et al., 2014). The *another longfin* mutant was identified as having  
76 enlarged fins and barbels (Haffter et al., 1996). We have previously shown that *alf* is caused by a  
77 specific gain-of-function point mutation in the potassium channel *kcnk5b*, a member of the  
78 TWIK/TASK two pore family (K<sub>2P</sub>) of potassium channels (Perathoner et al., 2014). Supporting  
79 a role for ion regulation in establishing proportion, the *shortfin* (*sof*) mutant has been mapped  
80 back to mutations in the gap junction *connexin43* (*cx43/gjal*) (Iovine et al., 2005; Sims et al.,  
81 2009). Though both gap junctions and potassium channels have important roles in physiology  
82 and cell biology, these initial findings in the zebrafish fin are surprising in that they uncover a  
83 specific role for local bioelectric signaling in the regulation and coordination of growth.

84 Insight into the mechanisms regulating coordinated growth also comes from  
85 pharmacological regulation of cell signaling during development. Inhibition of calcineurin in  
86 developing and regenerating fins by FK506 and cyclosporin A specifically increases the size of  
87 the resulting fin (Kujawski et al., 2014). Calcineurin is a protein phosphatase known to affect  
88 transcription through direct binding and dephosphorylation of the NFAT family of transcription  
89 factors (Hogan et al., 2003). Analysis of the patterning and gene expression profiles in

90 overgrown fins treated with FK506 led Kujawski and colleagues to suggest that positional  
91 information of the fin was specifically altered by calcineurin inhibition. Under this hypothesis,  
92 activation of calcineurin triggers a proximal-like growth program that leads to enhanced  
93 proliferation to re-specify larger fin sizes (Kujawski et al., 2014).

94 Here, we extend analysis into mechanisms of size regulation by potassium channels and  
95 calcineurin using the zebrafish fin as a model. We show that FK506 can mirror the growth  
96 effects of activated *Kcnk5b*, and can override genetic determination of size. Importantly, we  
97 demonstrate that *Kcnk5b* function is a key component to the ability of FK506 to regulate growth.  
98 Through our genetic and experimental analyses, we demonstrate that the growth-mediating  
99 properties of FK506 do not re-specify positional memory in the fin, but rather act to maintain  
100 heightened rate of growth during regeneration of the fin. These data advance our understanding  
101 of how size is regulated during growth and provide a regulatory link between bioelectric and  
102 classical signaling pathways in the regulation of growth and proportion.

## 103 **Results**

104 **Skeletal phenotypes of fins treated with FK506 compared to mutants affecting fin**  
105 **proportion.** Fins are composed of multiple segmented rays of dermal bone. Elongation of the  
106 fin occurs through sequential addition of these bony segments to the distal fin tip. The zebrafish  
107 fin-ray segments are regularly patterned such that each segment is of roughly same length along  
108 the proximal-distal axis. While the segmentation pattern of the fin rays can be dissociated from  
109 total fin length (Schulte et al., 2011), mutants with altered fin size are often accompanied by a  
110 change in size of segments, consistent with alterations in the rate of growth (Goldsmith et al.,  
111 2003; Perathoner et al., 2014; Sims et al., 2009). The fin segments in *kcnk5b/alf* mutant are  
112 generally elongated, while those of the *shortfin* mutant are shorter (Iovine et al., 2005;  
113 Perathoner et al., 2014)(**Figure S1**).

114 As segmentation patterns are influenced by mutations that alter fin size, we asked  
115 whether FK506 treatment had an effect on segmentation patterning. We focused primarily on fin  
116 regeneration, which recapitulates growth properties that occur during fin development. During  
117 fin regeneration, both the missing fin tissue and segmentation patterns are precisely restored.  
118 Thus, regeneration assays can serve as a foundation for exploring the genetic contributions of  
119 positional identity and memory, growth rate, and patterning. Treatment of regenerating fins with

120 the calcineurin inhibitors FK506 and cyclosporin A led to dose-dependent coordinated  
121 overgrowth of fin regenerates (Kujawski et al., 2014)(**Figure S1E**). FK506-treated fins also  
122 exhibited elongated fin ray segments, similar to those observed in *kcnk5b/alf* mutants (**Figure**  
123 **S1E F,G**). Surprisingly, FK506 treatment of *cx43/shortfin* regenerating fins also resulted in  
124 elongated fin ray segments (**Figure S1H**).

125 **FK506 treatment regulates growth independently of memory of size.** As treatment of fins  
126 with FK506 appears to bypass the genetic specification of normal fin length in wild-type fish  
127 (Kujawski et al., 2014), we sought to define the growth characteristics of inhibiting calcineurin  
128 in the background of different mutants with altered fin size. Similar to wildtype, when cut to  
129 50% of their initial size, the fins of short-finned (*gjal/sof*) and long-finned (*kcnk5b/alf*) fish  
130 regenerate back to their pre-amputation size over a similar time period despite their vastly  
131 different starting lengths (**Figure 1**). However, FK506-treatment of regenerating fins from both  
132 wild-type and *gjal* short-finned mutants leads to an increased rate of growth in each group,  
133 resulting in the formation of similarly sized, larger fins in both genotypes (**Figure 1**). Oddly, the  
134 shape and size of FK506-treated fins from *cx43/sof* mutants were indistinguishable from treated  
135 wild-type fins (**Figure S1H**). Of note, FK506-treatment of fish with gain-of-function of *kcnk5b*  
136 activity does not lead to an additional increase in the size of the regenerate or rate of its growth  
137 over untreated mutants (**Figure 1**). All fins treated with FK506 regrow at comparably increased  
138 rates, regardless of genotype or previous size. These data suggest that the effect of calcineurin on  
139 fin growth is acting at, or downstream of, mechanisms specifying size. Further, the phenotypic  
140 similarities between *alf* and those of FK506-treated fins raise the potential that these two  
141 mechanisms may be integrated.

142 **Kcnk5b activity is critical for growth effects of FK506.** Fish deficient for *kcnk5b* have normal  
143 fin proportions and growth (Perathoner et al., 2014). To assess the role of Kcnk5b in calcineurin  
144 growth regulation, we resected the pectoral fins of *kcnk5b*<sup>-/-</sup> fish and asked if the channel is  
145 needed for the FK506 growth response. Unexpectedly, the growth effects driven by FK506  
146 treatment are suppressed in *kcnk5b*<sup>-/-</sup> fish (**Figure 2A-C**). This effect was seen in both pectoral  
147 fin as well as caudal fin regeneration (**Figure 2D**). These data reveal that Kcnk5b is a critical  
148 component of FK506-mediated regulation of growth and size. Some additional growth occurs  
149 after FK506 treatment in *kcnk5b*<sup>-/-</sup> fish, raising the possibility that residual function of the *kcnk5a*  
150 paralogue or other targets of FK506 may contribute in part to the FK506 response

151 **Modification of *kcnk5b* function by calcineurin.** Kcnk5b could mediate FK506 growth effect  
152 indirectly or through modification of calcineurin regulation. Increasing the levels of wild-type  
153 *kcnk5b* locally in the fin is sufficient to induce fin overgrowth (Perathoner et al., 2014). As large  
154 changes in transcription are observed in regenerating fins treated with FK506 (Kujawski et al.,  
155 2014), we hypothesized that FK506 mediated overgrowth could be due to upregulation of *kcnk5b*  
156 expression levels. However, we find that expression of *kcnk5b* is not significantly altered in  
157 wild-type regenerating fins after FK506 treatment (**Figure 3A**). To test the potential for direct  
158 modulation of channel activity by FK506/calcineurin, we assessed the change in conductance of  
159 Kcnk5b channel variants in *Xenopus* oocytes. Oocytes expressing wild-type zebrafish Kcnk5b  
160 show decreased conductance when treated with FK506 (**Figure 3D-E**; see Nam et al., 2011).  
161 Similarly, treatment of oocytes expressing *kcnk5b* with VIVIT, an independent peptide inhibitor  
162 of calcineurin, showed a comparable decrease in conductance, supporting a role of calcineurin in  
163 regulation of channel activity (**Figure 3E inset**).

164 It has been shown that the activity of another KCNK two-pore potassium channel family  
165 member, Kcnk18/TRESK, is regulated by direct binding of calcineurin to the intracellular loop  
166 of the channel. This binding affects downstream dephosphorylation events on conserved serine  
167 residues on the C-terminus of the channel (Czirják and Enyedi, 2006; Czirják et al., 2004).  
168 Intriguingly, we identified a putative calcineurin binding site in the cytoplasmic C-terminus of  
169 zebrafish Kcnk5b that is similar to that identified in KCNK18/TRESK (**Figure 3B**). Czirják et al  
170 previously demonstrated that an isoleucine to alanine mutation in this domain in TRESK  
171 attenuated the effect of calcineurin and its binding to the channel (Czirják and Enyedi, 2006). We  
172 mutated the co-responding residue in the presumptive binding site in Kcnk5b (I290A; **Figure**  
173 **3B**) and assessed the effect on conductance of the channel in oocytes. Oocytes expressing  
174 Kcnk5b/I290A had lower conductance than wildtype, but were similar to wild-type channels  
175 treated with FK506 (**Figure 3C-E**). Importantly, the Kcnk5b/I290A expressing oocytes were  
176 also non-responsive to FK506 treatment. Thus, the effect of the altering the molecular  
177 characteristics of this site on the Kcnk5b C-terminal intracellular domain is comparable in effect  
178 to chemical inhibition of calcineurin by FK506. This result suggests that, similar to KCNK18,  
179 the activity of Kcnk5b is modulated by calcineurin through interactions with the cytoplasmic C-  
180 terminus.

181           The *alf* mutation affects the last transmembrane domain of the channel located just prior  
182 to the predicted calcineurin binding site (Perathoner et al 2014, **Figure S3**). In an effort to  
183 screen for further variants affecting growth within this region, we used CRISPR-targeted Cas9  
184 genetic editing with guides targeted to the fifth exon of *kcnk5b*, which contains the  
185 transmembrane and C-terminus, and screened adults for somatic clones sufficient to cause  
186 overgrowth. We recovered fish having overgrowth caused by guides targeting the  
187 transmembrane region of the channel. Analysis of *Kcnk5b* in these clones revealed formation of  
188 frameshift mutations leading to early termination (**Figure S3**). Thus, loss of the last  
189 transmembrane domain and the cytoplasmic tail of *Kcnk5b* is sufficient to lead to increased  
190 proportion.

191 **Calcineurin signaling does not re-specify positional cues, rather overrides them.** We have  
192 demonstrated an interaction between *Kcnk5b* and calcineurin-mediated signaling in regulating  
193 growth. However, the ability of this module to specify growth or identity of the fin remains  
194 unclear. Kujawski *et al.* (2014) provide evidence of perdurance of proximal markers in treated  
195 fins and suggest that calcineurin inhibition leads to a re-specification of the regenerating tissue to  
196 a proximal identity. However, these data are also consistent with the hypothesis that the  
197 treatment leads to a sustained increase in the rate of growth that then is associated with broader  
198 domains of regional markers in the enlarged regenerated tissue. To address the effect of  
199 calcineurin on altering positional information of the fin, we mirrored classic experiments of  
200 Maden (1982) in regulation of positional identity of limb regenerates in the salamander and  
201 asked if limited alteration of calcineurin could re-specify identity of the fin regenerate and thus its  
202 interpretation of fate.

203           We first approached this question by addressing how fins respond when FK506 is  
204 removed. Pectoral fins regenerating under the influence of FK506 exhibited increased growth  
205 (**Figure 2, S1**). However, after removal of the drug, either prior to achieving their original size,  
206 or in fins that had surpassed their original size, regenerative growth quickly stopped regardless of  
207 the extent of the fin regenerate (**Figure 4A**). Thus, FK506 induces an acceleration of growth that  
208 requires continual presence of the drug for sustained overgrowth. We extended these studies to  
209 address if the identity of the regenerated tissue was altered by treatment with FK506. As  
210 amputated fins will regenerate back to a size similar to that originally specified during

211 development, the fin tissue remaining after amputation retains information concerning size and  
212 proportion that is then integrated in the regenerate. However, if overgrown fins caused by  
213 FK506 inhibition of calcineurin are resected, either into the original fin tissue or within a  
214 regenerated portion of the fin, these resulting regenerates grew only to the original size of the fin  
215 prior to treatment with FK506 (**Figure 4B,C**). Similarly, FK506-treated overgrown fins cut  
216 beyond the original wild-type fin length failed to grow further upon amputation without the  
217 presence of the drug (**Figure 4C**). Similar effects were seen in when tested in both pectoral as  
218 well as caudal fin regenerates (**Figure S2**). Thus, *Kcnk5b*/calcineurin signaling does not lead to  
219 lasting alterations in positional identity, but rather regulates rate of growth leading to enhanced  
220 fin proportions.

## 221 **Discussion**

### 222 Bioelectric integration of growth and form

223 Bioelectric potential is manifest as a resting voltage state of cells (*V<sub>mem</sub>*). While it is clear that  
224 specialized cells such as nerves and cardiomyocytes have honed the regulation of electrical  
225 potential for specific functions, a broader role of this signaling in development and homeostasis  
226 is becoming apparent as it is necessary for normal pattern and growth of diverse organ systems  
227 (Bates, 2015; Beane et al., 2013; Dahal et al., 2012; Levin, 2014a; Levin, 2014b). Natural and  
228 experimental changes of resting potential can have broad effects in morphogenesis. A key  
229 property of bioelectric signaling is the capacity to coordinate responses across cells and tissues.  
230 Many tissues are electrically coupled through the action of gap junctions, and localized signals  
231 can expand via paracrine signaling by local fluctuations in electrical fields (Levin, 2012). Thus,  
232 the integration of cellular- and tissue-level responses to inductive signals as well as integration of  
233 patterning cues within developing organs can be orchestrated through electrical coupling of cells  
234 such that a unified structure is formed and maintained. Perturbations of such electrically coupled-  
235 developmental systems could be a factor for the coordinated transformations observed in  
236 evolution (Gould, 1966; Thompson, 1917) and broad patterning phenotype observed in some  
237 diseases (Bates, 2013; Dahal 2017). The role of *kcnk5b* in regulation of proportion was  
238 identified in genetic screens through its actions in causing altered scaling properties of adult fins  
239 (Perathoner et al 2014). We show that *Kcnk5b* is a key component to increased fin growth  
240 caused by calcineurin inhibition. Importantly, our work here demonstrates that



241 Kcnk5b/calcineurin signaling is sufficient to increase growth regardless of innate size and  
242 genotype and thus override, but not re-specify, positional identity of the fin.

243 We demonstrate that Kcnk5b, like Kcnk18, can signal through calcineurin via a region in  
244 its C-terminus. Altering the presumptive binding site on the C-terminus of Kcnk5b (I290A) is  
245 sufficient to mirror the effect of calcineurin inhibition and to remove sensitivity to FK506  
246 treatment for conductance. FK506 treatment of Kcnk5b in oocytes leads to decreased current.  
247 Similarly, the I290A mutation also mirrors this response. In contrast, *alf* mutants (Perathoner et  
248 al., 2014) show increased conductance in oocytes. This difference of the direction of  
249 conductance with similar growth outcomes may also point to the importance of signaling events  
250 downstream of changes in conductance that drive fin growth. The C-terminus of mouse  
251 Kcnk5/TASK-2 interacts directly with G $\beta$  $\gamma$  subunit of heterotrimeric G-proteins (Añazco et al.,  
252 2013), and work on other two pore potassium channels, such as TREK-1 and TREK-2, has  
253 revealed dynamic regulation by cAMP/PKA, DAG/PIP/PKC and nitric oxide/cGMP/PKG  
254 pathways (Enyedi and Czirják, 2010). Modulation of Kcnk5b activity by conductance, or  
255 through interactions with its C-terminus, may act to adjust and/or respond to changes in voltage  
256 to regulate growth rate. Interestingly, we have found that premature truncation mutations  
257 leading to channels that lack the last transmembrane domain and the C-terminus of Kcnk5b  
258 result in fin overgrowth comparable to that seen in the *alf* mutant, which affects the identical  
259 region (F241Y, **Figure S3**). As null alleles of *kcnk5b* do not cause an overgrowth phenotype, the  
260 truncation mutation appears to cause an increase in function of the channel. Alteration of the  
261 pore structure or conformation/presence of the C-terminus may cause dysregulated channel  
262 activity leading to overgrowth. The regulation of calcineurin may reflect downstream response to  
263 changes in conductance or conformation and thus, link calcium signaling to changes in pore  
264 conductance and/or conformation.

### 265 Coordination of growth and proportion

266 Regulation of overgrowth by Kcnk5b/calcineurin signaling is coordinated among diverse tissues  
267 of the developing and regenerating fin to establish a larger, functional structure. This  
268 coordination may be attained through a re-interpretation of positional information within the fin  
269 such that regenerating tissues replace the missing components with tissue in register with the  
270 distal edge of the remaining fin stump. Positional information within the fin may be set up and  
271 driven by differential gene expression patterns in development (Rabinowitz et al., 2017; Tornini

272 and Poss, 2014). Rabinowitz *et al.* (2017) detail expression profiles of wild-type fins that  
273 support dynamic regulation of gene expression across the proximal-distal aspect of the fin.  
274 Interestingly, a significant class of genes differentially isolated in these studies was ion channels,  
275 suggesting that bioelectric signaling may be a key factor of this asymmetry and establishment of  
276 positional cues. The work on calcineurin by Kujawski *et al.* (2014) also would point to  
277 calcineurin signaling as mediating position and being able to re-specify identity when altered.  
278 This mechanism was founded on extended gene expression domains in the proximal component  
279 of the fin and delayed distal bifurcation of the rays after calcineurin inhibition. However, an  
280 alternate explanation for the observed changes in pattern is that the expanded proximal molecular  
281 and anatomical identities observed in FK506-treated fins are a consequence of increased growth  
282 rate, such that larger regional domains, interpreted as position, are generated rather than specific  
283 changes in identity *per se*. This hypothesis would explain observed overgrowth as well as  
284 extended branching of the fin, but would be independent of changes in positional memory.  
285 Alternatively, positional information is independent of size instructive signals suggesting that  
286 modification of identity markers stemming from *Kcnk5b*/calcineurin signaling is coincident, but  
287 independent from, mechanisms of size determination and relative proportion.

288 Our data link the growth regulation of *Kcnk5b* and calcineurin and demonstrate that their  
289 function is not sufficient to re-specify identity, rather to override it. Establishing, or re-  
290 establishing, identity in the fin may require signals present only during development and may not  
291 be malleable during regeneration. Long-term treatment of fish during development with FK506  
292 leads to global alterations in growth of the body that make comparison of proportion difficult  
293 (**Figure S4**). Thus, identification of these developmental cues to regulate proportion and size will  
294 require dissociation by other means. Our findings suggest that the regulation of growth by  
295 *Kcnk5b*/calcineurin fulfills the general requirements of a scaling property previously defined by  
296 relative growth comparisons and represented by the rate constant of Huxley and Teissier (1939).  
297 The encoding and specification of absolute size, however remains undefined.

## 298 **Acknowledgements**

299 The authors wish to thank Drs. Christopher Antos and Satu Kujawski for their discussions of  
300 data on calcineurin prior to publication. *Sof* mutant lines were kindly provided by Dr. Kathryn  
301 Iovine. This work was supported in part by NSF GRFP and DDIG DEB-1407092 to JMD, and

302 Grant HD084985 from NICHD, a John Simon Guggenheim Fellowship to MPH as well as  
303 support from the Children's Orthopaedic Surgery Foundation at Boston Children's Hospital.

304

## 305 **References**

306 **Añazco, C., Peña-Münzenmayer, G., Araya, C., Cid, L. P., Sepúlveda, F. V and Niemeyer,**  
307 **M. I.** (2013). G protein modulation of K2P potassium channel TASK-2 : a role of basic  
308 residues in the C terminus domain. *Pflugers Arch.* **465**, 1715–26.

309 **Bates, E. A.** (2013). A potential molecular target for morphological defects of fetal alcohol  
310 syndrome: Kir2.1. *Curr. Opin. Genet. Dev.* **23**, 324–329.

311 **Bates, E.** (2015). Ion Channels in Development and Cancer. *Annu. Rev. Cell Dev. Biol.* **31**, 231–  
312 47.

313 **Beane, W. S., Morokuma, J., Lemire, J. M. and Levin, M.** (2013). Bioelectric signaling  
314 regulates head and organ size during planarian regeneration. *Development* **140**, 313–322.

315 **Bryant, P. J. and Simpson, P.** (1984). Intrinsic and Extrinsic Control of Growth in Developing  
316 Organs. *Q. Rev. Biol.* **59**, 387–415.

317 **Conlon, I. and Raff, M.** (1999). Size Control in Animal Development. *Cell* **96**, 235–244.

318 **Czirják, G. and Enyedi, P.** (2006). Targeting of calcineurin to an NFAT-like docking site is  
319 required for the calcium-dependent activation of the background K<sup>+</sup> channel, TRESK. *J.*  
320 *Biol. Chem.* **281**, 14677–82.

321 **Czirják, G., Tóth, Z. E. and Enyedi, P.** (2004). The two-pore domain K<sup>+</sup> channel, TRESK, is  
322 activated by the cytoplasmic calcium signal through calcineurin. *J. Biol. Chem.* **279**, 18550–  
323 8.

324 **Dahal, G. R., Rawson, J., Gassaway, B., Kwok, B., Tong, Y., Ptacek, L. J. and Bates, E.**  
325 (2012). An inwardly rectifying K<sup>+</sup> channel is required for patterning. *Development* **139**,  
326 3653–3664.

327 **Dahal, G. R., Pradhan S. J. and Bates, E.** (2017). Inwardly rectifying potassium channels  
328 influence *Drosophila* wing morphogenesis by regulating Dpp release. *Development* **144**,  
329 2771–2783.

- 330
- 331 **Dittmer, J. E., Goss, R. J. and Dinsmore, C. E.** (1974). The growth of infant hearts grafted to  
332 young and adult rats. *Am. J. Anat.* **141**, 155–60.
- 333 **Edgar, R. C.** (2004). MUSCLE: multiple sequence alignment with high accuracy and high  
334 throughput. *Nucleic Acids Res.* **32**, 1792–7.
- 335 **Eeden, F. J. M. Van, Granato, M., Schach, U., Brand, M., Furutani-seiki, M., Haffter, P.,**  
336 **Hammerschmidt, M., Heisenberg, C., Jiang, Y., Kane, D. A., et al.** (1996). Genetic  
337 analysis of fin formation in the zebrafish, *Danio rerio*. *Development* **123**, 255–262.
- 338 **Enyedi, P. and Czirják, G.** (2010). Molecular Background of Leak K<sup>+</sup> Currents : Two-Pore  
339 Domain Potassium Channels. *Physiol. Rev.* **90**, 559–605.
- 340 **Felts, W. J. L.** (1959). Transplantation studies of factors in skeletal organogenesis. I. The  
341 subcutaneously implanted immature long-bone of the rat and mouse. *Am. J. Phys.*  
342 *Anthropol.* **17**, 201–215.
- 343 **Finkielstain, G. P., Lui, J. C. and Baron, J.** (2013). Catch-up growth: cellular and molecular  
344 mechanisms. *World Rev. Nutr. Diet.* **106**, 100–4.
- 345 **Fisher, S., Jagadeeswaran, P. and Halpern, M. E.** (2003). Radiographic analysis of zebrafish  
346 skeletal defects. *Dev. Biol.* **264**, 64–76.
- 347 **Fu, Y., Foden, J. a, Khayter, C., Maeder, M. L., Reyon, D., Joung, J. K. and Sander, J. D.**  
348 (2013). High-frequency off-target mutagenesis induced by CRISPR-Cas nucleases in human  
349 cells. *Nat. Biotechnol.* **31**, 822–826.
- 350 **Gagnon, J. a, Valen, E., Thyme, S. B., Huang, P., Ahkmetova, L., Pauli, A., Montague, T.**  
351 **G., Zimmerman, S., Richter, C. and Schier, A. F.** (2014). Efficient mutagenesis by Cas9  
352 protein-mediated oligonucleotide insertion and large-scale assessment of single-guide  
353 RNAs. *PLoS One* **9**, e98186.
- 354 **Gayon, J.** (2000). History of the concept of allometry. *Am. Zool.* **40**, 748–758.
- 355 **Goldsmith, M. I., Fisher, S., Waterman, R. and Johnson, S. L.** (2003). Saltatory control of  
356 isometric growth in the zebrafish caudal fin is disrupted in long fin and rapunzel mutants.  
357 *Dev. Biol.* **259**, 303–317.

- 358 **Gould, S. J.** (1966). Allometry and size in ontogeny and phylogeny. *Biol. Rev. Camb. Philos.*  
359 *Soc.* **41**, 587–640.
- 360 **Green, J., Taylor, J. J., Hindes, A., Johnson, S. L. and Goldsmith, M. I.** (2009). A gain of  
361 function mutation causing skeletal overgrowth in the rapunzel mutant. *Dev. Biol.* **334**, 224–  
362 34.
- 363 **Haffter, P., Granato, M., Brand, M., Mullins, M. C., Hammerschmidt, M., Kane, D. a,**  
364 **Odenthal, J., van Eeden, F. J., Jiang, Y. J., Heisenberg, C. P., et al.** (1996). The  
365 identification of genes with unique and essential functions in the development of the  
366 zebrafish, *Danio rerio*. *Development* **123**, 1–36.
- 367 **Hogan, P. G., Chen, L., Nardone, J. and Rao, A.** (2003). Transcriptional regulation by  
368 calcium, calcineurin, and NFAT. *Genes Dev.* **17**, 2205–32.
- 369 **Huang, C., Wang, T.-C., Lin, B.-H., Wang, Y.-W., Johnson, S. L. and Yu, J.** (2009).  
370 Collagen IX is required for the integrity of collagen II fibrils and the regulation of vascular  
371 plexus formation in zebrafish caudal fins. *Dev. Biol.* **332**, 360–70.
- 372 **Huxley, J. and Teissier, G.** (1936). Terminology of Relative Growth. *Nature* **137**, 780–781.
- 373 **Hwang, W. Y., Fu, Y., Reyon, D., Maeder, M. L., Kaini, P., Sander, J. D., Joung, J. K.,**  
374 **Peterson, R. T. and Yeh, J.-R. J.** (2013a). Heritable and precise zebrafish genome editing  
375 using a CRISPR-Cas system. *PLoS One* **8**, e68708.
- 376 **Hwang, W. Y., Fu, Y., Reyon, D., Maeder, M. L., Tsai, S. Q., Sander, J. D., Peterson, R. T.,**  
377 **Yeh, J.-R. J. and Joung, J. K.** (2013b). Efficient genome editing in zebrafish using a  
378 CRISPR-Cas system. *Nat. Biotechnol.* [227-229](#).
- 379 **Iovine, M. K. and Johnson, S. L.** (2000). Genetic analysis of isometric growth control  
380 mechanisms in the zebrafish caudal Fin. *Genetics* **155**, 1321–9.
- 381 **Iovine, M. K., Higgins, E. P., Hindes, A., Coblitz, B. and Johnson, S. L.** (2005). Mutations in  
382 connexin43 (GJA1) perturb bone growth in zebrafish fins. *Dev. Biol.* **278**, 208–19.
- 383 **Julian Huxley** (1932). *Problems in Relative Growth*. New York: Lincoln MacVeagh, The Dial  
384 Press.
- 385 **Kujawski, S., Lin, W., Kitte, F., Börmel, M., Fuchs, S., Arulmozhivarman, G., Vogt, S.,**

- 386        **Theil, D., Zhang, Y. and Antos, C. L.** (2014). Calcineurin Regulates Coordinated  
387        Outgrowth of Zebrafish Regenerating Fins. *Dev. Cell* **28**, 573–587.
- 388        **Labun, K., Montague, T. G., Gagnon, J. A., Thyme, S. B. and Valen, E.** (2016).  
389        CHOPCHOP v2: a web tool for the next generation of CRISPR genome engineering.  
390        *Nucleic Acids Res.* **44**, gkw398.
- 391        **Lee, Y., Grill, S., Sanchez, A., Murphy-Ryan, M. and Poss, K. D.** (2005). Fgf signaling  
392        instructs position-dependent growth rate during zebrafish fin regeneration. *Development*  
393        **132**, 5173–83.
- 394        **Maden M.** (1982). Vitamin A and pattern formation in the regenerating limb. *Nature*  
395        **295**: 672-675.
- 396        **Levin, M.** (2012). Morphogenetic fields in embryogenesis, regeneration, and cancer: Non-local  
397        control of complex patterning. *BioSystems* **109**, 243–261.
- 398        **Levin, M.** (2014a). Endogenous bioelectrical networks store non-genetic patterning information  
399        during development and regeneration. *J. Physiol.* **592**, 2295–305.
- 400        **Levin, M.** (2014b). Molecular bioelectricity: how endogenous voltage potentials control cell  
401        behavior and instruct pattern regulation in vivo. *Mol. Biol. Cell* **25**, 3835–50.
- 402        **Montague, T. G., Cruz, J. M., Gagnon, J. A., Church, G. M. and Valen, E.** (2014).  
403        CHOPCHOP: A CRISPR/Cas9 and TALEN web tool for genome editing. *Nucleic Acids*  
404        *Res.* **42**, 401–407.
- 405        **Morgan, T. H.** (1906). The physiology of regeneration. *J. Exp. Zool.* **3**, 457–500.
- 406        **Nam, J. H., Shin, D. H., Zheng, H., Lee, D., Park, S. J., Park, K. S. and Kim, S. J.** (2011).  
407        Expression of TASK-2 and its upregulation by B cell receptor stimulation in WEHI-231  
408        mouse immature B cells. *Am. J. Physiol. Cell Physiol.* **300**, C1013-22.
- 409        **Nüsslein-Volhard, C. and Dahm, R.** (2002). Zebrafish: a practical approach.
- 410        **Perathoner, S.** (2013). Potassium Channels and Growth Control: Identification and  
411        Characterisation of Mutations Affecting Proportional Growth of the Fin in the Cyprinid  
412        *Danio rerio*.
- 413        **Perathoner, S., Daane, J. M., Henrion, U., Seebohm, G., Higdon, C. W., Johnson, S. L.,**

- 414 **Nüsslein-Volhard, C. and Harris, M. P.** (2014). Bioelectric signaling regulates size in  
415 zebrafish fins. *PLoS Genet.* **10**, e1004080.
- 416 **Prader, A., Tanner, J. M. and von Harnack, G. a.** (1963). Catch-up growth following illness  
417 or starvation: An example of developmental canalization in man. *J. Pediatr.* **62**, 646–659.
- 418 **Rabinowitz, J. S., Robitaille, A. M., Wang, Y., Ray, C. A., Thummel, R., Gu, H., Djukovic,**  
419 **D., Raftery, D., Berndt, J. D. and Moon, R. T.** (2017). Transcriptomic, proteomic, and  
420 metabolomic landscape of positional memory in the caudal fin of zebrafish. *Proc. Natl.*  
421 *Acad. Sci.* 201620755.
- 422 **Schulte, C. J., Allen, C., England, S. J., Juárez-Morales, J. L. and Lewis, K. E.** (2011). *Evx1*  
423 is required for joint formation in zebrafish fin dermoskeleton. *Dev. Dyn.* **240**, 1240–8.
- 424 **Seebohm, G., Strutz-Seebohm, N., Baltaev, R., Korniyuchuk, G., Knirsch, M., Engel, J. and**  
425 **Lang, F.** (2005). Regulation of KCNQ4 potassium channel prepulse dependence and  
426 current amplitude by SGK1 in *Xenopus* oocytes. *Cell Physiol Biochem* **16**, 255–262.
- 427 **Sims, K., Eble, D. M. and Iovine, M. K.** (2009). Connexin43 regulates joint location in  
428 zebrafish fins. *Dev. Biol.* **327**, 410–8.
- 429 **Spallanzani, L.** (1769). *An essay on animal reproductions (Trans. M. Maty)*. London : T.  
430 Becket and P.A. de Hondt.
- 431 **Tassava, R. and Goss, R.** (1966). Regeneration rate and amputation level in fish fins and lizard  
432 tails. *Growth* **30**, 9–21.
- 433 **Thompson, D. W.** (1917). *On growth and form*. Cambridge University press.
- 434 **Tornini, V. A. and Poss, K. D.** (2014). Keeping at arm’s length during regeneration. *Dev. Cell*  
435 **29**, 139–145.
- 436 **Twitty, V. C., Schwind, J. L. and Joseph, L.** (1931). The growth of eyes and limbs  
437 transplanted heteroplastically between two species of *Amblystoma*. *J. Exp. Zool.* **59**, 61–86.

438

## 439 **Figure Legends**

440 **Figure 1. Calcineurin inhibition is sufficient to override genetic encoding of size. A)**

441 Regenerative growth of zebrafish pectoral fins after resection to ~50% of pre-cut fin length at 0

442 days post amputation in different genetic backgrounds with short- (*cx43<sup>sof/sof</sup>*) or long- (*kcnk5b<sup>alf</sup>*)  
443 fin size relative to wild-type fish. Dashed lines indicate pre-cut pectoral fin length. Data  
444 normalized to standard length (STL) of each fish. B) Representative ventral view of pectoral fins  
445 after regeneration. Black line indicates unoperated pectoral fin length. Red line indicates pectoral  
446 fin length after treatment with FK506 during regeneration. Black dashed line highlights site of  
447 amputation. Growth rate of FK506-treated regenerating caudal fins. D). Caudal fins were  
448 resected to 50% of their original size and treated with FK506. Growth rate is analyzed through 9  
449 days post amputation, when regenerative growth rate for DMSO treated fins begins to slow.  
450 Two-tailed t-test  $p < 0.0007$  for suppression of growth in the absence of *kcnk5b*. Error bars  
451 represent  $\pm$  SEM.

452 **Figure 2. Kcnk5b mediates the effect of calcineurin in regulating proportion.** A) Example  
453 of growth of pectoral fins of wildtype or *kcnk5b* deletion mutants regenerating after treatment  
454 with FK506. Dashed line indicates plane of section; black bar extent of growth of untreated fin;  
455 red, resected fin. B) Growth rates of wildtype and *kcnk5b* deficient zebrafish. Dashed line, size  
456 of original pre-cut fin; Error bars represent  $\pm$  SEM. C) Growth rate of regenerating fins of  
457 different *kcnk5b* genotypes treated with FK506. Gray dots represent individual fish. Two-tailed  
458 t-test  $p < 0.0002$  for suppression of growth in the absence of *kcnk5b*. Data is from four  
459 independent experiments. (C) Representative ventral view of pectoral fins after regeneration.

460 **Figure 3. FK506 effect on Kcnk5b activity is modulated by the cytoplasmic domain of the**  
461 **channel.** (A) qRT-PCR comparing relative levels of *kcnk5b* in FK506-treated, 5-day post-  
462 amputation pectoral fin blastemas to values of DMSO-treated controls ( $n=5$ ,  $\pm$  SEM). (B)  
463 Multiple sequence alignment of Kcnk5b protein highlighting putative calcineurin binding  
464 domain with resemblance to calcineurin binding in TRESK (red bar, PQIVID (Czirják and  
465 Enyedi, 2006) and a nearby suite of highly conserved serine residues (green bars). Asterisk  
466 indicates site of mutagenesis in (C-E) (I290A). Alignment generated by MUSCLE (Edgar,  
467 2004). Diagram adapted from (Perathoner, 2013). (C) Representative electrophysiology current  
468 traces from voltage clamp recordings in *Xenopus* oocyte injected with wild-type or mutant I290A  
469 Kcnk5b cRNA and treated with FK506 or DMSO. The membrane potential was clamped at a  
470 reference potential of  $-80$  mV and then varied by incremental 20mV steps to a range of  $-100$ mV  
471 to  $+60$ mV. (D) Current is suppressed in wild-type Kcnk5b homodimers through treatment with  
472 FK506 or by mutation of the calcineurin binding site (I290A). (E) Recorded currents were



473 normalized to the value recorded for oocytes injected with the wild-type channel at +60 mV.  
474 *Inset*, *Xenopus* oocytes expressing wild-type zebrafish *Kcnk5b* were injected with VIVIT  
475 peptide or carrier. Patch clamp experiments registered the resulting conductance. \*\*  $p < 0.001$ , n,  
476 number of oocytes assessed.

477 **Figure 4. Calcineurin inhibition establishes regenerative growth rate independently of**  
478 **positional identity.** A) Pulse of FK506 treatment for 6 or 14 days post-amputation to assess  
479 effects of transient inhibition of calcineurin by FK506 on growth and patterning of the fin. Fins  
480 were cut to 50% original length and allowed to regenerate in the presence of FK506. Arrows  
481 indicate end of drug treatment (n=5 fish per treatment group). (B) Subsequent regeneration of the  
482 pectoral fins from (A) in the absence of FK506 after resection at original cut site to determine if  
483 fin allometry was re-set to a larger size through previous FK506 treatment. (C) Second  
484 regeneration of FK506-treated fins cut at a site within the regenerated tissue demonstrating  
485 memory of original positional information and recovery of wild-type size within the pectoral fin.  
486 Gray dashed line indicates pre-cut fin length. Red dashed lines indicate second resection. Error  
487 bars represent  $\pm$  SEM.

488 **Supplemental Figure 1. Proportion and patterning of zebrafish fins is enhanced by**  
489 **calcineurin inhibition.** Fin growth occurs through sequential addition of a regular pattern of  
490 lepidotrichia hemi-ray dermal bone segments at growing end of the fin. Patterning of fin  
491 segmentation in A) wildtype, B) *alf* and C) *sof* pectoral fins; stacked blue rectangles model  
492 sequential addition and segmentation of individual rays. D) Schematic of regenerating pectoral  
493 fin assay to assess relative scaling. One pectoral fin is cut to approximately 50% of original size  
494 and allowed to regenerate. Comparisons to the contralateral side enables analysis of previous  
495 size and effect of treatment on non-regenerating fins. E) Dose response of FK506 treatment of  
496 pectoral fin growth. F-H) Pattern of segmentation of the lepidotrichia in F) regenerating wild-  
497 type, or regenerating FK506 treated wild-type or *sof* fins; solid line, plane of resection. While  
498 segments are normally restored during regeneration, regenerating fins treated with FK506 show  
499 elongated segmentation after regeneration similar to the *alf* phenotype (B). Error bars represent  
500  $\pm$  SEM. \* p-value < 0.05. \*\*\* p-value < 0.001.

501

502 **Supplementary Figure 2. Calcineurin inhibition does not re-specify positional information**  
503 **of the caudal fin.** Caudal fins were amputated and grown in FK506 for 15 days. The drug was

504 removed (green arrow indicates stoppage of treatment) at which point the FK506 treated fins  
505 ceased further growth. These fins were then re-cut at either the original amputation plane (A) or  
506 at the site of the original fin length prior to FK506 treatment (B). Gray dashed line indicates pre-  
507 cut fin length. Red dashed lines indicate second resection. Blue dashed lines indicate extent of  
508 FK506 overgrowth. Error bars represent  $\pm$  SEM.

509

### 510 **Supplementary Figure 3. Deletion screen of *kcnk5b* reveals essential role of C-terminus.**

511 Using specific guide RNAs against the last exon of *knck5b* encoding the last transmembrane and  
512 cytoplasmic tail of the channel, we screened injected founders for evidence of overgrowth. We  
513 identified localized clones having specific overgrowth of the fins. B) Analysis of the changes in  
514 the overgrown tissues demonstrated presence of local deletions in *kcnk5b* predicted to cause  
515 truncation of the channel in a comparable location as to the *alf* mutation (C).

516

### 517 **Supplementary Figure 4. Growth deficit during FK506 treatment of juveniles.**

518 Wild-type juvenile zebrafish treated with FK506 did not grow when treated starting at ages of 30 days (A)  
519 or 55 days (B). C) Representative image of stunted growth in FK506 treated fish relative to  
520 DMSO treated siblings. n=10 fish per group. Error bars represent  $\pm$  SEM.

521

## 522 **Supplemental Document 1. Experimental Procedures**

### 523 Fish Husbandry

524 The zebrafish AB strains and Tübingen (Tü) strains carrying *albino* mutation were used as  
525 background for all experiments. Fish were bred and maintained as previously described  
526 (Nüsslein-Volhard and Dahm, 2002). All experimental procedures involving fish conform to  
527 AAALAC standards and were approved by institutional IACUC committees. A complete  
528 description of the husbandry and environmental conditions in housing for the fish used in these  
529 experiments is available as a collection in [protocols.io dx.doi.org/10.17504/protocols.io.mrjc54n](https://doi.org/10.17504/protocols.io.mrjc54n)  
530 For all experiments, adult stages defined by reproductively mature fish >3 months old were used  
531 for analysis. Mutant alleles used in this work are *alf*<sup>dt30mh</sup>, *sof*<sup>aj7e2</sup>, and *kcnk5b*<sup>j131x8</sup>.

### 532 Fin Regeneration and Measurements

533 Fish were anesthetized by treatment with tricaine for measurements and pectoral fin amputation.  
534 Unless otherwise indicated, pectoral fins of wildtype and mutants were resected to roughly 50%

535 their pre-cut length using standard surgical scissors. Fin length was measured before, during and  
536 after regeneration using handheld calipers and measurements were normalized to the fish  
537 standard length, determined as the length from the tip of the snout to the posterior end of the  
538 caudal peduncle.

539

540

#### 541 FK506 Treatment

542 Stock FK506 (Sigma) was dissolved in dimethyl sulfoxide (DMSO; Sigma). Fish water was  
543 treated with 100nM FK506 unless otherwise indicated. Up to five individual zebrafish were  
544 housed in 1L of FK506- or DMSO-treated fish water and were fed daily with live artemia.  
545 Water and drug were refreshed every other day throughout the duration of the experiment.

#### 546 qRT-PCR

547 Five days post amputation, pectoral fin regenerates were collected from five individuals of each  
548 treatment group. For RNA extraction, tissue was homogenized in TRIzol Reagent (Invitrogen).  
549 cDNA synthesis was performed with oligo dT primers using SuperScript III Reverse  
550 Transcription Kit (Invitrogen). qRT-PCR was performed with Power SYBR Green Master Mix  
551 (Applied Biosystems) on Applied Biosystems ViiA 7 Real Time PCR System. Cycling  
552 conditions: 10 minutes at 95°C; 40 cycles of 15 seconds at 95°C followed by 1 minute at 60°C;  
553 melting curve analysis with 15 seconds at 95°C, 1 minute at 60°C and 15 seconds at 95°C.  
554 Temperature was varied at 1.6°C/s. Expression levels were normalized relative to  $\beta$ -actin. ddCt  
555 was used to calculate fold change in FK506-treated relative to the average of DMSO-treated fish.  
556 *Kcnk5b* primers: 5'-TTGTAGCCGTCTGTGACCAA-3', 5'-AGTACCGCACCCAAACTGTC-  
557 3'.  *$\beta$ -actin* primers: 5'-CAACAACCTGCTGGGCAAA-3', 5'-GCGTCGATGTCTGAAGGTCA-  
558 3'.

#### 559 Electrophysiology

560 The cDNA of *Kcnk5b* was subcloned into pSGEM for cRNA expression. The plasmid was  
561 linearized using *NheI* and cRNA was *in vitro* synthesized using the T7 mMessage mMachine kit  
562 (Ambion). *Xenopus laevis* oocytes were provided by Ecocyte Bioscience. Oocyte handling,  
563 injection and electrophysiological recordings were as previously described(Seebohm et al.,  
564 2005). Briefly, stage V oocytes were injected with 4 ng of cRNA encoding wildtype or mutant

565 I290A *kcnk5b* and stored for 3 days at 18°C in Barth's solution containing (in mmol/L):  
566 88 NaCl, 1.0 KCl, 2.4 NaHCO<sub>3</sub>, 0.33 Ca(NO<sub>3</sub>)<sub>2</sub>, 0.4 CaCl<sub>2</sub>, 0.8 MgSO<sub>4</sub>, 5 Tris-HCl, penicillin-G  
567 (63 mg/L), gentamicin (100 mg/L), streptomycin sulfate (40 mg/L), theophylline (80 mg/L); pH  
568 7.6. Two-electrode-voltage--clamp recordings were performed at 22°C using a Turbo Tec-10CD  
569 amplifier (NPI electronics), Digidata 1322A AD/DA-interface and pCLAMP 9.0 software (Axon  
570 Instruments Inc. / Molecular Devices). Before measurement oocytes were pre-incubated in 0.5 %  
571 DMSO (control) or in 50 µM FK506 (InvivoGen) for 1 h at 18°C in ND96 recording solution  
572 containing (in mM): 96 NaCl, 4 KCl, 1.8 MgCl<sub>2</sub>, 1.0 CaCl<sub>2</sub>, 5 HEPES; pH 7.6. FK506 was  
573 dissolved in DMSO and FK506 dilution in ND96 was prepared freshly before every experiment.  
574 Recording pipettes were filled with 3 M KCl and had resistances of 0.5-1.5 MΩ. Data were  
575 analyzed with Clampfit 9.0 (Molecular Devices Corporation), Excel (Microsoft) and Prism6  
576 (GraphPad Software). The *Kcnk5b* I290A variant was generated by QuikChange II (Agilent).  
577 Mutagenesis primers : 5'-CTCGCTCTGGAGTCGCTGACATCTTTGAG-3', 5'-  
578 CTCAAAGATGTCAGCGACTCCAGAGCGAG-3'.

#### §79 CRISPR generation of *kcnk5b* somatic clones

580 The fifth and terminal exon of zebrafish *kcnk5b* encodes the last transmembrane domain and  
581 cytoplasmic C-terminus. We designed guide RNAs (gRNA) tiling this exon to screen for  
582 sufficiency of deletions in this region to affect fin growth in mosaic injected animals. The  
583 ChopChop online was used to design gRNAs to limit predicted off-target gRNA cutting (Labun  
584 et al., 2016; Montague et al., 2014). The pool of 5 distinct gRNAs were simultaneously injected  
585 to blanket the start of the exon. These gRNAs were assembled according to Gangon et al.  
586 (Gagnon et al., 2014). Briefly, oligos containing the gRNA target were annealing to a universal  
587 oligo containing the tracrRNA and SP6 promoter. The annealed oligo ends were then filled in  
588 with T4 polymerase for 20 minutes at 12°C. gRNA was synthesized from this oligo template  
589 using Ambion MEGAscript SP6 Kit. For transcription efficiency, the first two bases of each  
590 gRNA were changed to 'GG' as there is evidence that these bases have less effect on Cas9  
591 cutting efficiency or off-target binding than mutations closer to the PAM site (Fu et al., 2013;  
592 Hwang et al., 2013a; Hwang et al., 2013b). gRNAs were injected into single cell zebrafish  
593 embryos at a concentration of 50ng/µl blanket and 300ng/µl Cas9. To screen for deletion  
594 efficiency, the target exon was amplified from pools of three 24 hour embryos and the resulting  
595 amplicons were heated to 95°C and cooled at -0.1°C per second to form heteroduplexes.

596 Following heteroduplex PCR, a T7 endonuclease digestion for 30 minutes at 37°C in NEB  
597 Buffer 2 was used to generate deletions in the presence of Cas9-induced indels. Primers for  
598 colony PCR cloning of the exon 5 screen: 5'-GGCAAATCAAACCTGGTTAGTCC-3', 5'-  
599 CGCTGTAGTCCTCGACCTTC-3'. gRNA sequences: 5'-ATCACTTTGTTTCCATACAG-3',  
600 5'-GACAAAGAATCTGTAGAGAG-3', 5'-GGATCTACCTGGGCCTTGCT-3', 5'-  
601 TTGGAACGTGCATATGGTGG-3', 5'-CGTCATCGGTGGGCAGCCTG-3'.  
602

Figure 1

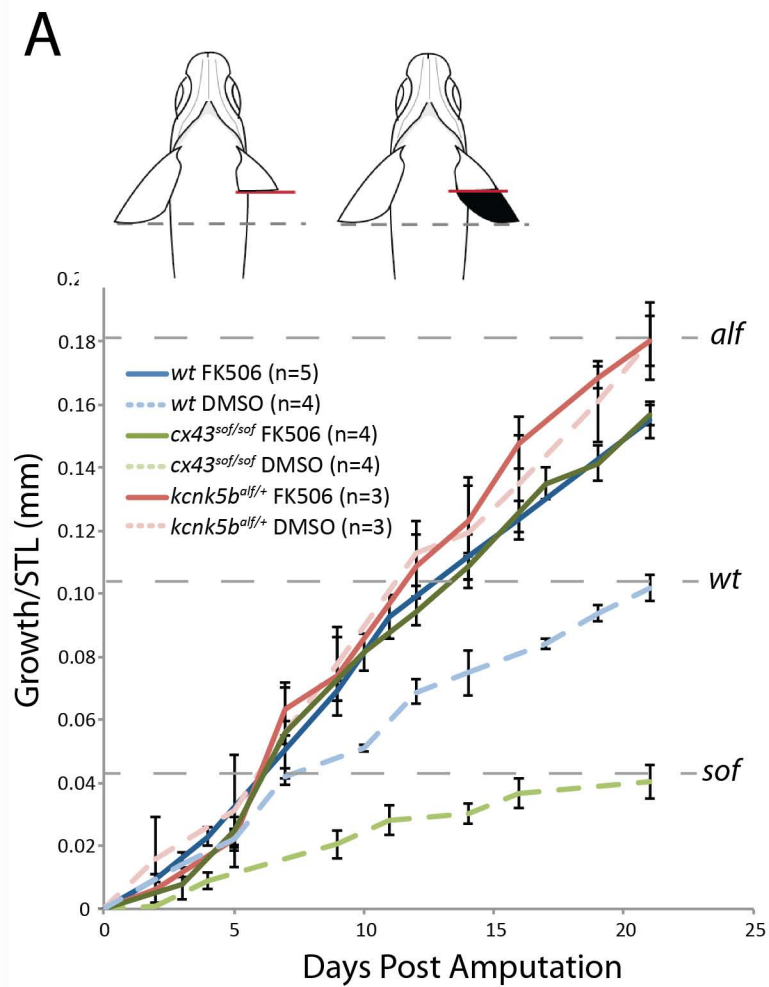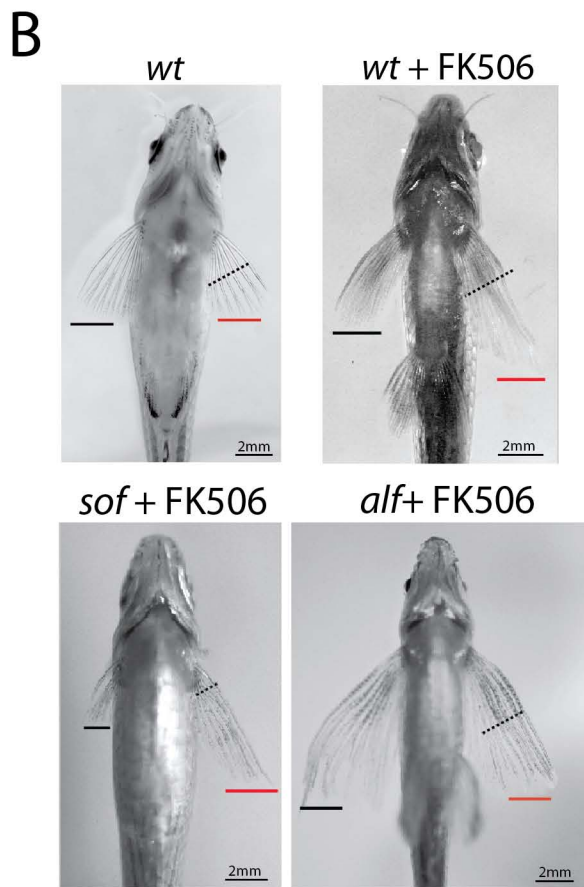

# Figure 2

## A

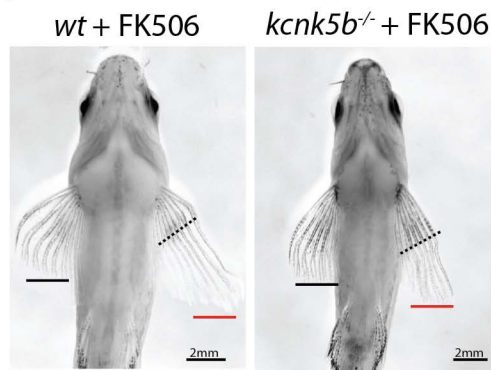

## B

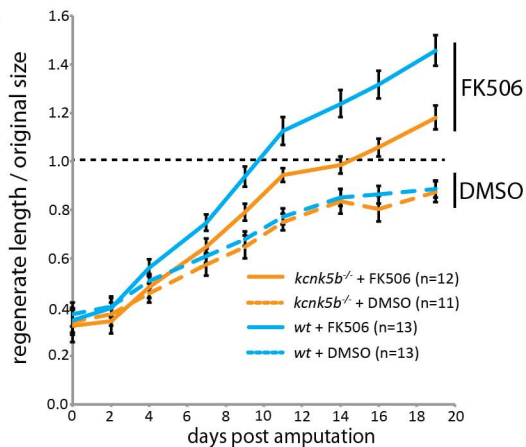

## C

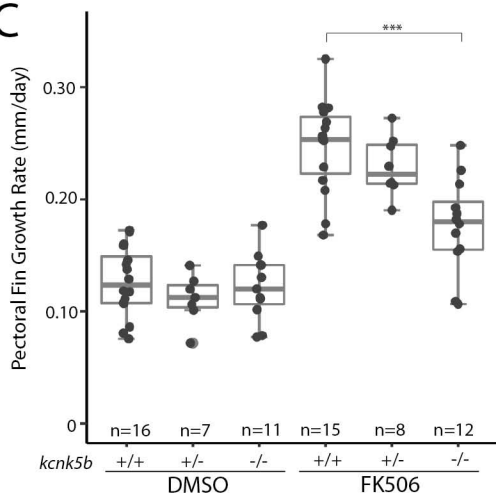

## D

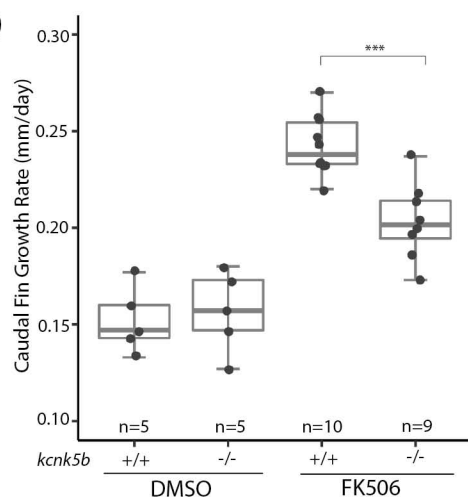

# Figure 3

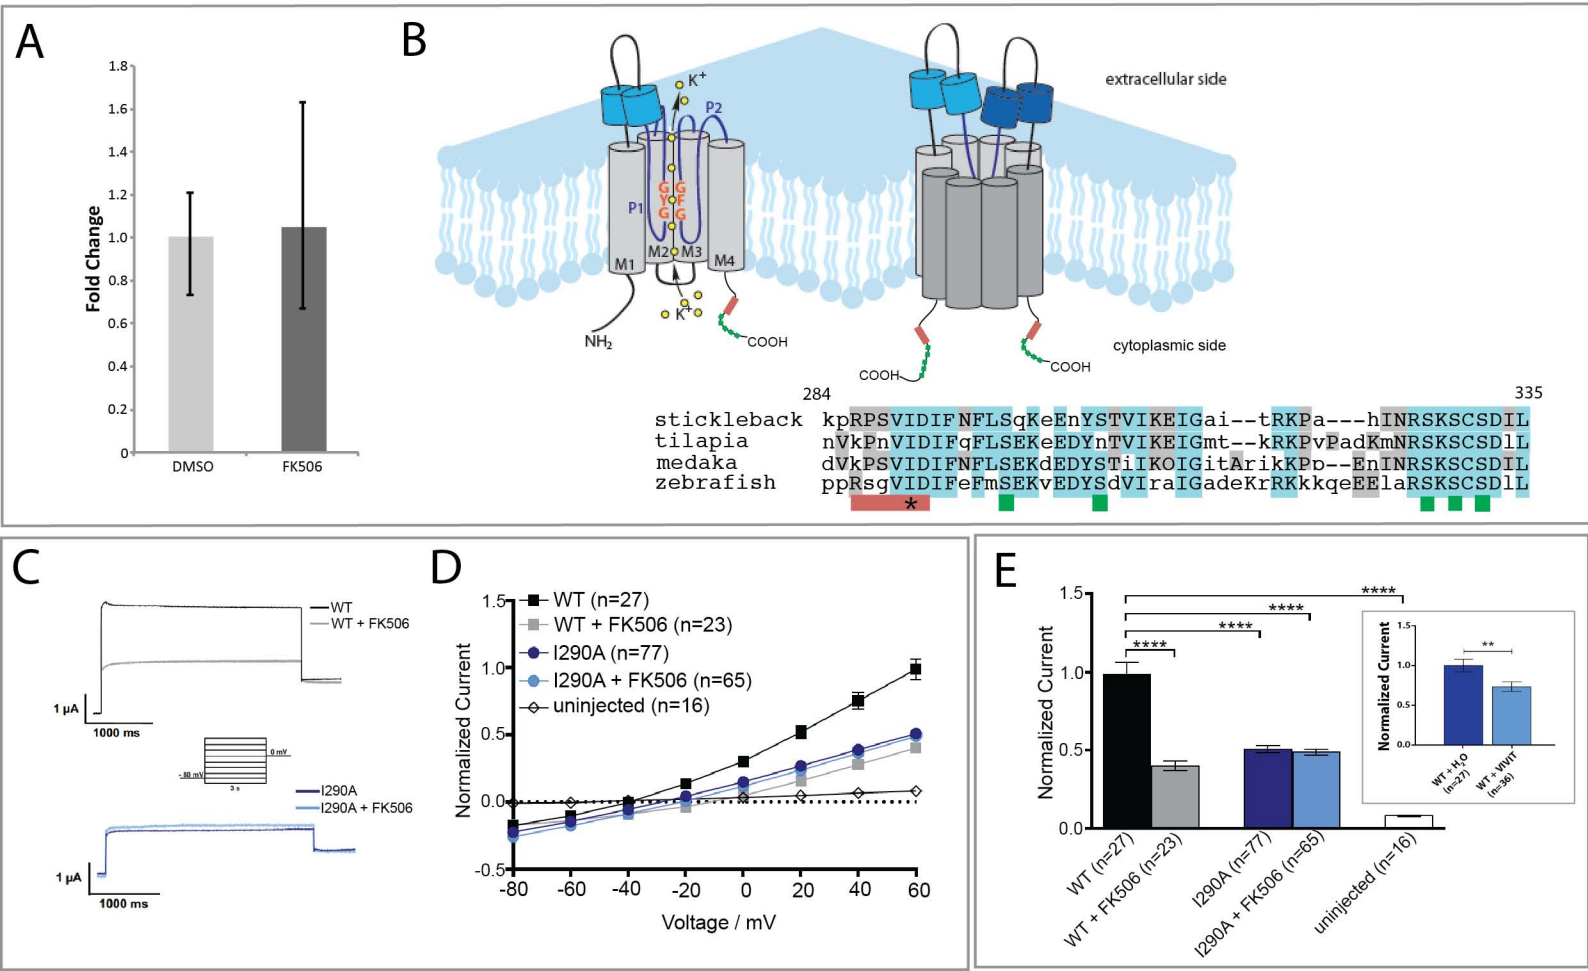



# Figure 4

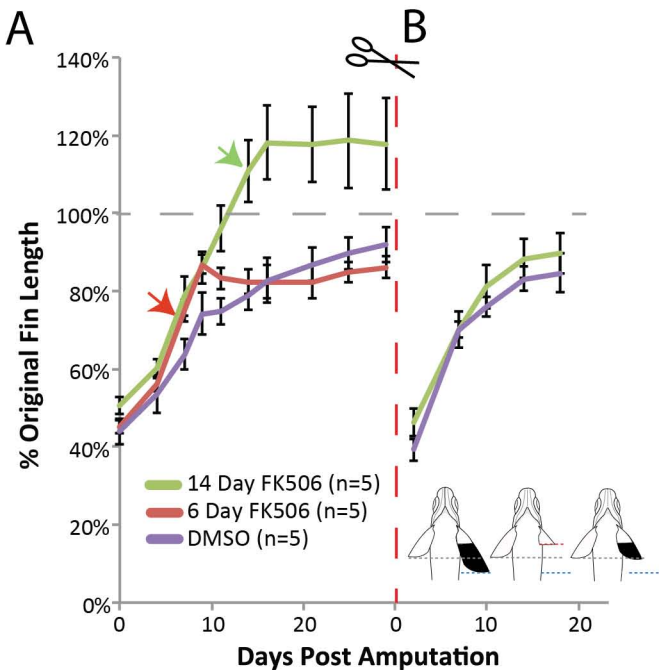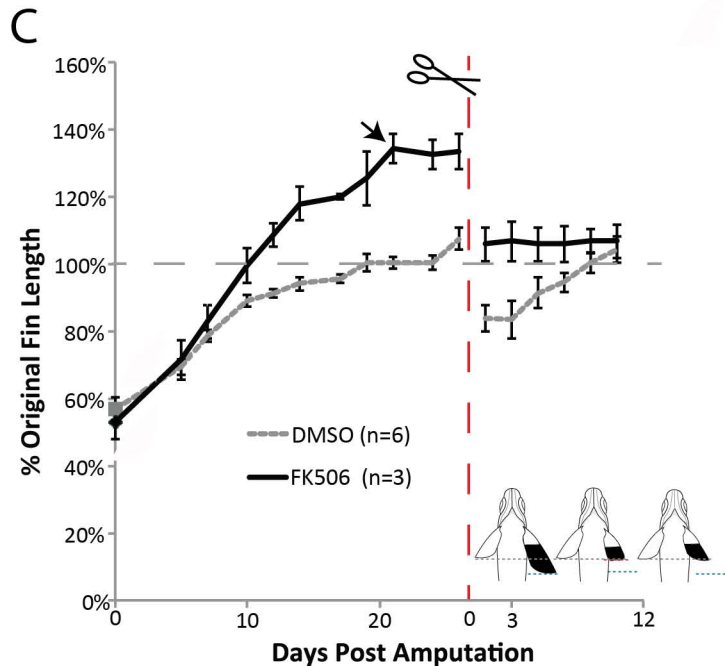

# Figure S1

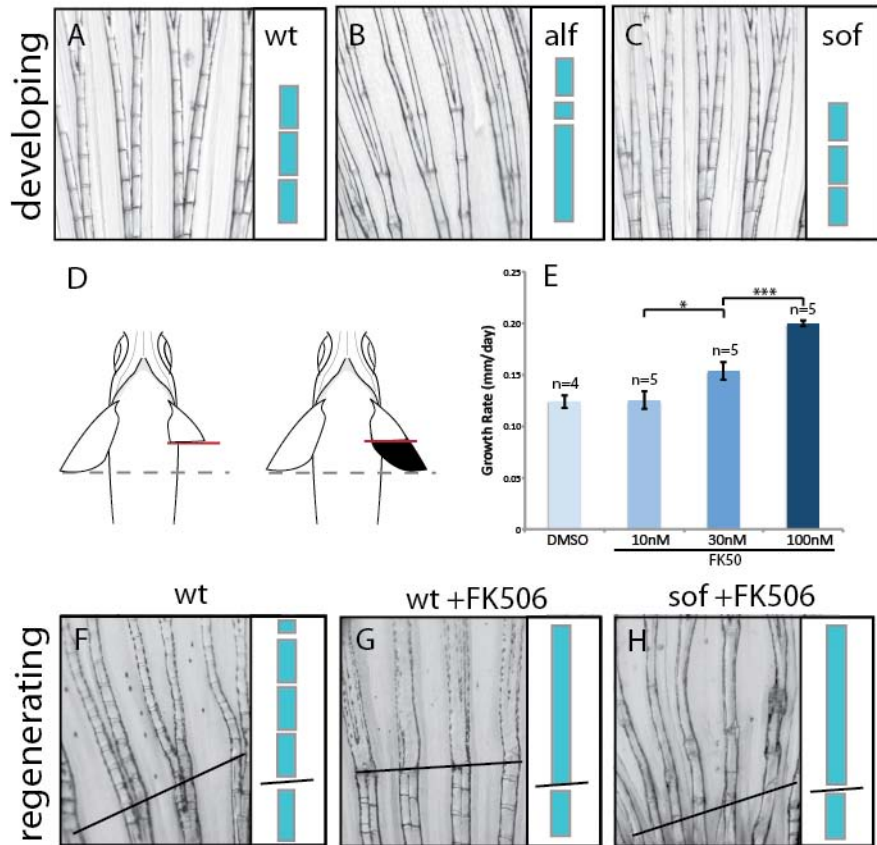

Figure S2

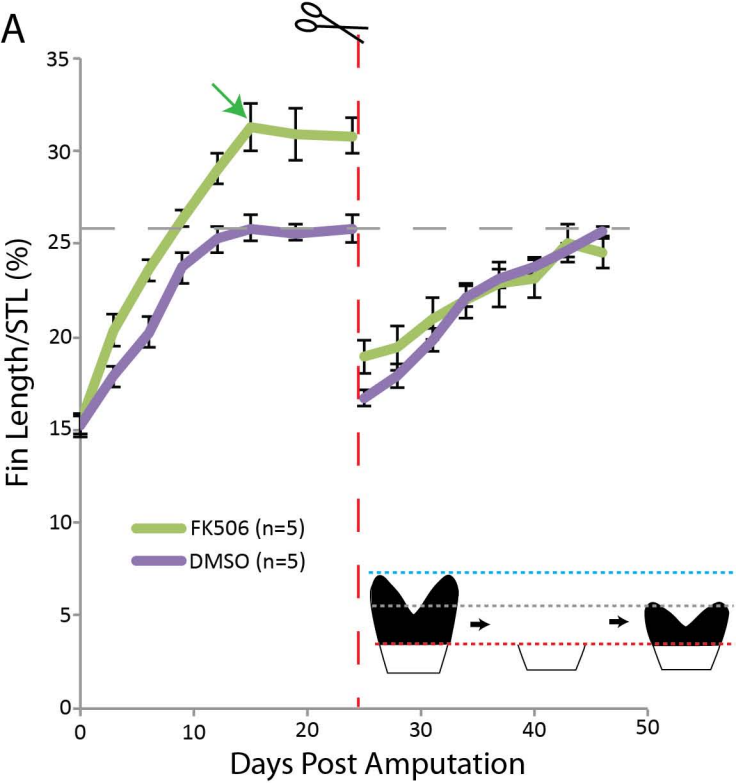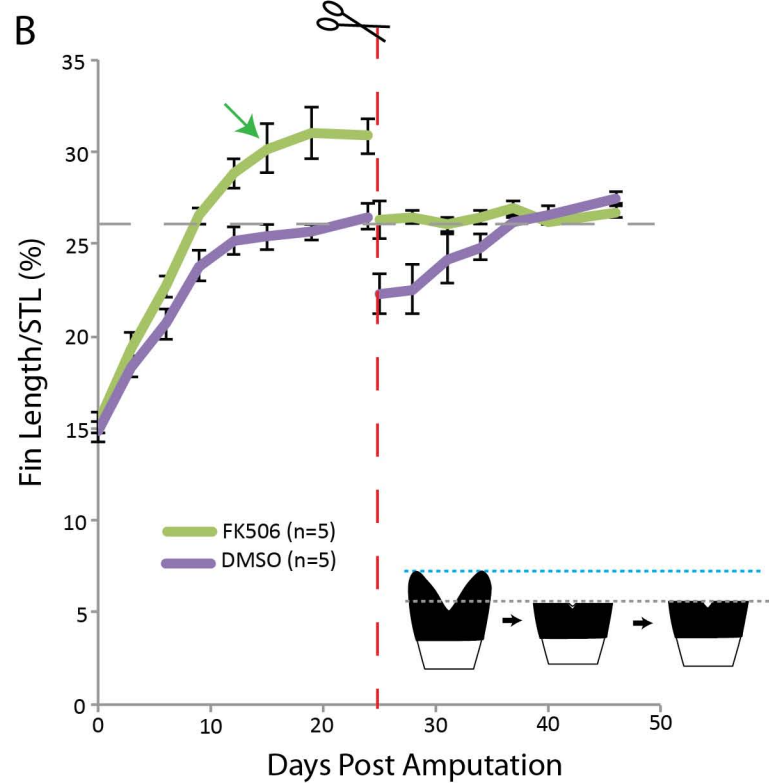

Figure S3

A P0 *gcknk5b*-exon5

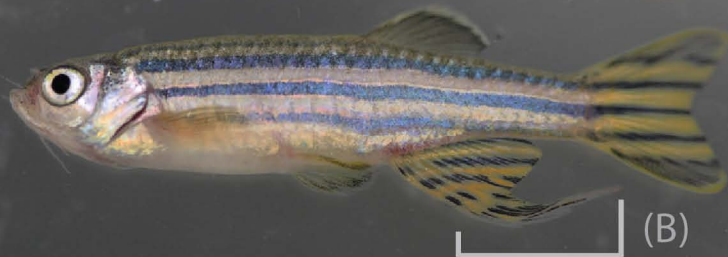

B  
 TTGTCCAGCTATGGATCTACCTGGGCCTTGCTTGGTTGTCATTG wt  
 TTGTCCAGCTATGGAT-----GCTTGGTTGTCATTG -13  
 4/16 clones

TM domain M4  
 FFVQLWIYLGAWLSLFFSWNVHMMVVEAHKV.....  
 FFVQLWMLGCHCSSVGTCIWWKLIKF.  
 ^ F241Y(alf)

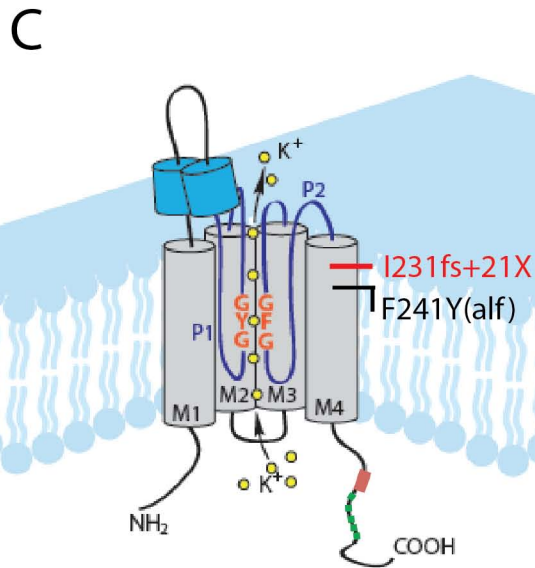

# Figure S4

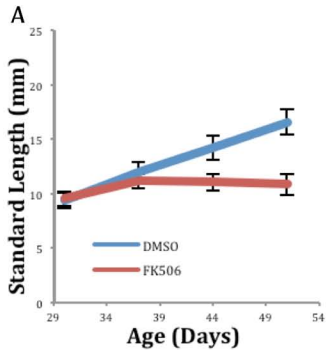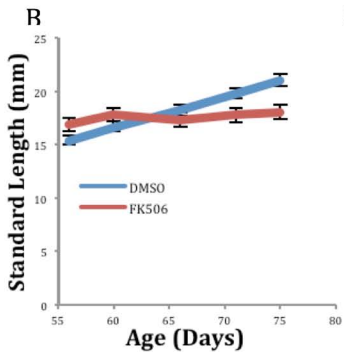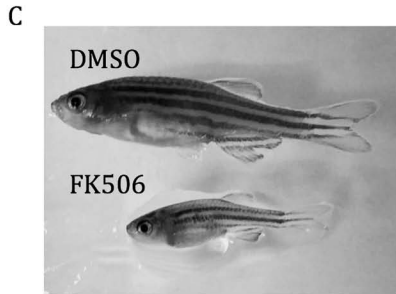

Source: https://www.biorxiv.org/content/10.1101/258442v1.full.pdf
